# Supplementary material
Source: PubMed Central journal article supplement (PMC3234773)
Supplement: supp_M111.256529_suppdata.pdf [file supp_M111.256529_suppdata.pdf]

| Gene Symbol | Assay ID      | Gene Symbol | Assay ID      |
|-------------|---------------|-------------|---------------|
| 1. GAPDH    | Hs99999905_m1 | 25. LIFR    | Hs00158730_m1 |
| 2. CCNA2    | Hs00996788_m1 | 26. CD164   | Hs00985280_m1 |
| 3. TGFB1    | Hs00998133_m1 | 27. SIGLEC1 | Hs00988063_m1 |
| 4. TGFB2    | Hs01548875_m1 | 28. KDR     | Hs00176676_m1 |
| 5. TGFB3    | Hs01086000_m1 | 29. PPARG   | Hs00234592_m1 |
| 6. ENG      | Hs00923996_m1 | 30. BMPR1B  | Hs00176144_m1 |
| 7. MCAM     | Hs00174838_m1 | 31. PTCH1   | Hs00970979_m1 |
| 8. ITGB1    | Hs01127543_m1 | 32. GLI1    | Hs00171790_m1 |
| 9. CD44     | Hs01075861_m1 | 33. GLI2    | Hs01119973_m1 |
| 10. THY1    | Hs00174816_m1 | 34. GLI3    | Hs00609233_m1 |
| 11. NGFR    | Hs00609976_m1 | 35. SMO     | Hs01090242_m1 |
| 12. ANPEP   | Hs00174265_m1 | 36. SP7     | Hs00541729_m1 |
| 13. ALCAM   | Hs00233455_m1 | 37. BMPR2   | Hs00176148_m1 |
| 14. CD34    | Hs02576480_m1 | 38. COL1A1  | Hs00164004_m1 |
| 15. KIT     | Hs00174029_m1 | 39. MSX2    | Hs00741177_m1 |
| 16. CD14    | Hs00169122_m1 | 40. OCN     | Hs00609452_g1 |
| 17. CD68    | Hs00154355_m1 | 41. BMPR1A  | Hs01034912_g1 |
| 18. CD163   | Hs00174705_m1 | 42. RUNX2   | Hs01047976_m1 |
| 19. GGT1    | Hs00980756_m1 | 43. ALPL    | Hs01029144_m1 |
| 20. MFI2    | Hs00195551_m1 | 44. BMP1    | Hs00196183_m1 |
| 21. ABCB1   | Hs00184500_m1 | 45. BMP2    | Hs01055564_m1 |
| 22. FZD9    | Hs00268954_s1 | 46. BMP4    | Hs00370078_m1 |
| 23. SEMA4D  | Hs00396705_m1 | 47. BMP5    | Hs00234930_m1 |
| 24. PVRL1   | Hs00161050_m1 | 48. BMP7    | Hs00233476_m1 |

**Table S1.** TaqMan gene expression assays used for single cell transcription analysis.

| Gene Name                              | Forward primer sequence (5' to 3') | Reverse primer sequence (5' to 3') |
|----------------------------------------|------------------------------------|------------------------------------|
| Osteogenic genes                       |                                    |                                    |
| ALP, human                             | ATGGGATGGGTGTCTCCACA               | CCACGAAGGGGAACTTGTC                |
| BMP2, human                            | ACCCGCTGTCTTCTAGCGT                | CTCAGGACCTCGTCAGAGGG               |
| BMP4, human                            | TTCCTGGTAACCGAATGCTGA              | CCCTGAATCTCGGGCGACTTTT             |
| BMPR1B, human                          | CTTTTGCGAAGTGCAGGAAAAT             | TGTTGACTGAGTCTTCTGGACAA            |
| COL1a1, human                          | ATGACTATGAGTATGGGGAAGCA            | TGGGTCCCTCTGTTACACTTT              |
| ENG, human                             | AGCCCCACAAGTCTTGCAG                | GCTAGTGGTATATGTCACCTCGC            |
| GAPDH, human                           | ATGGGGAAGGTGAAGGTCG                | GGGGTCATTGATGGCAACAATA             |
| OCN, human                             | CACTCCTCGCCCTATTGGC                | CCCTCCTGCTTGGACACAAAG              |
| RUNX2, human                           | ATTCCTGTAGATCCGAGCACC              | GCTCACGTCGCTCATTTTGC               |
| Adipogenic Genes                       |                                    |                                    |
| <i>AP2</i> , human                     | CCAGGGACTTTGGGTACGTG               | GGTTGAGAAATTCAGCTACTGCT            |
| <i>GCP1</i> , human                    | GCTTTCTGGGTGGACTCAAGT              | TCTAGTGTCTCTGTGAGGACTG             |
| <i>LPL</i> , human                     | TCATTCCCGGAGTAGCAGAGT              | GGCCACAAGTTTTGGCACC                |
| <i>PPAR<math>\gamma</math></i> , human | CCTATTGACCCAGAAAGCGATT             | CATTACGGAGAGATCCACGGA              |

**Table S2.** Quantitative PCR Genes and Primer Sequences

# Supplemental Figure 1

A

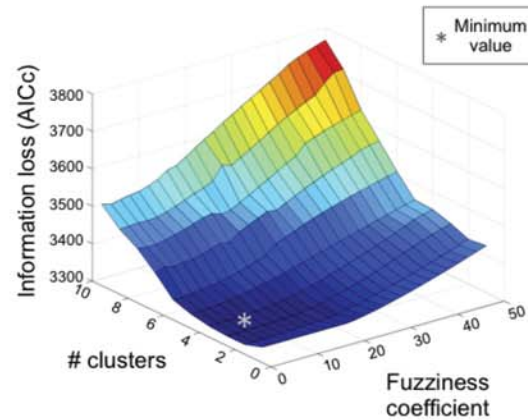

B

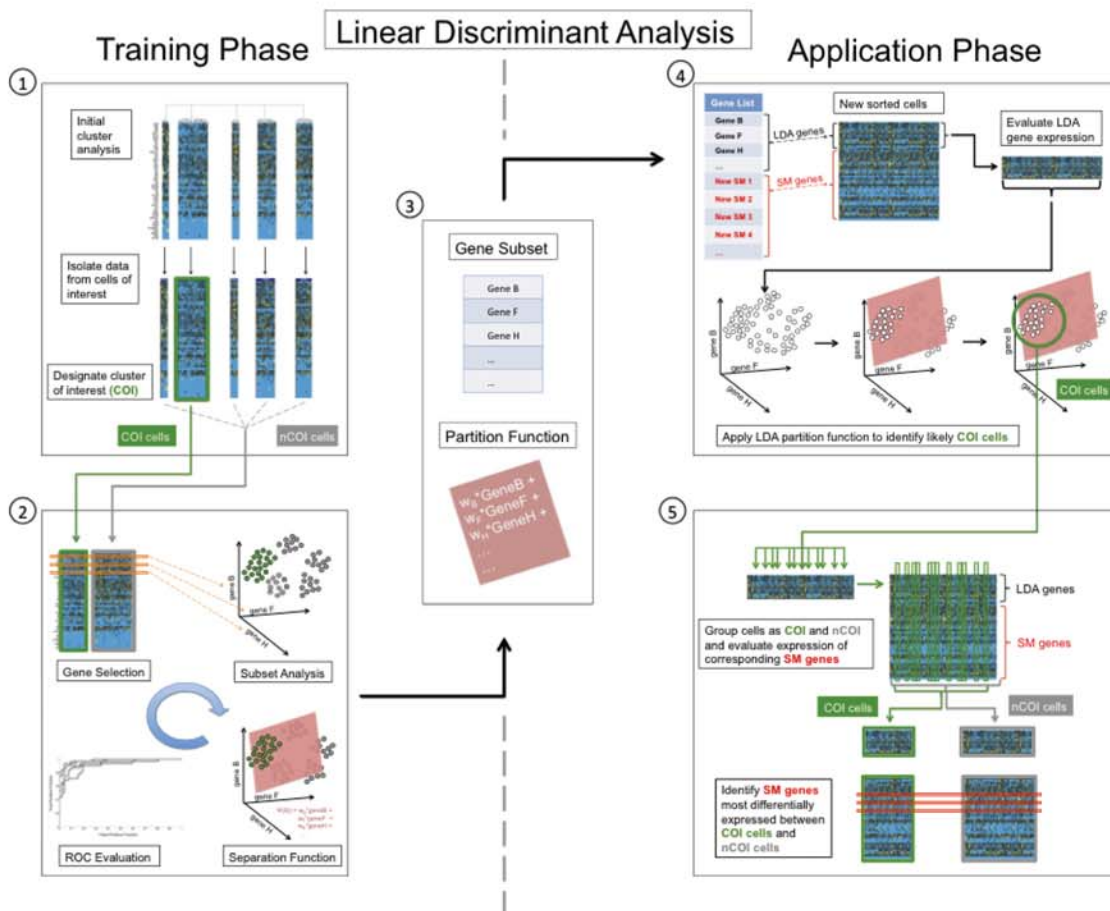

**Fig. S1. Clustering algorithm for single cell transcriptional data.** (A) Application of Akaike Information Criterion allows iterative determination of optimal clustering parameters to minimize theoretical information loss. An exhaustive approach is used to determine the information lost (z-axis) with different values for the number of clusters (y-axis) and the fuzziness coefficient (x-axis). The trough of this plot (asterisk) represents the optimal set of clustering parameters for a given data set. (B) Linear discriminate analysis schema. Dotted line denotes the separation between the training phase and the application phase.

## Supplemental Figure 2

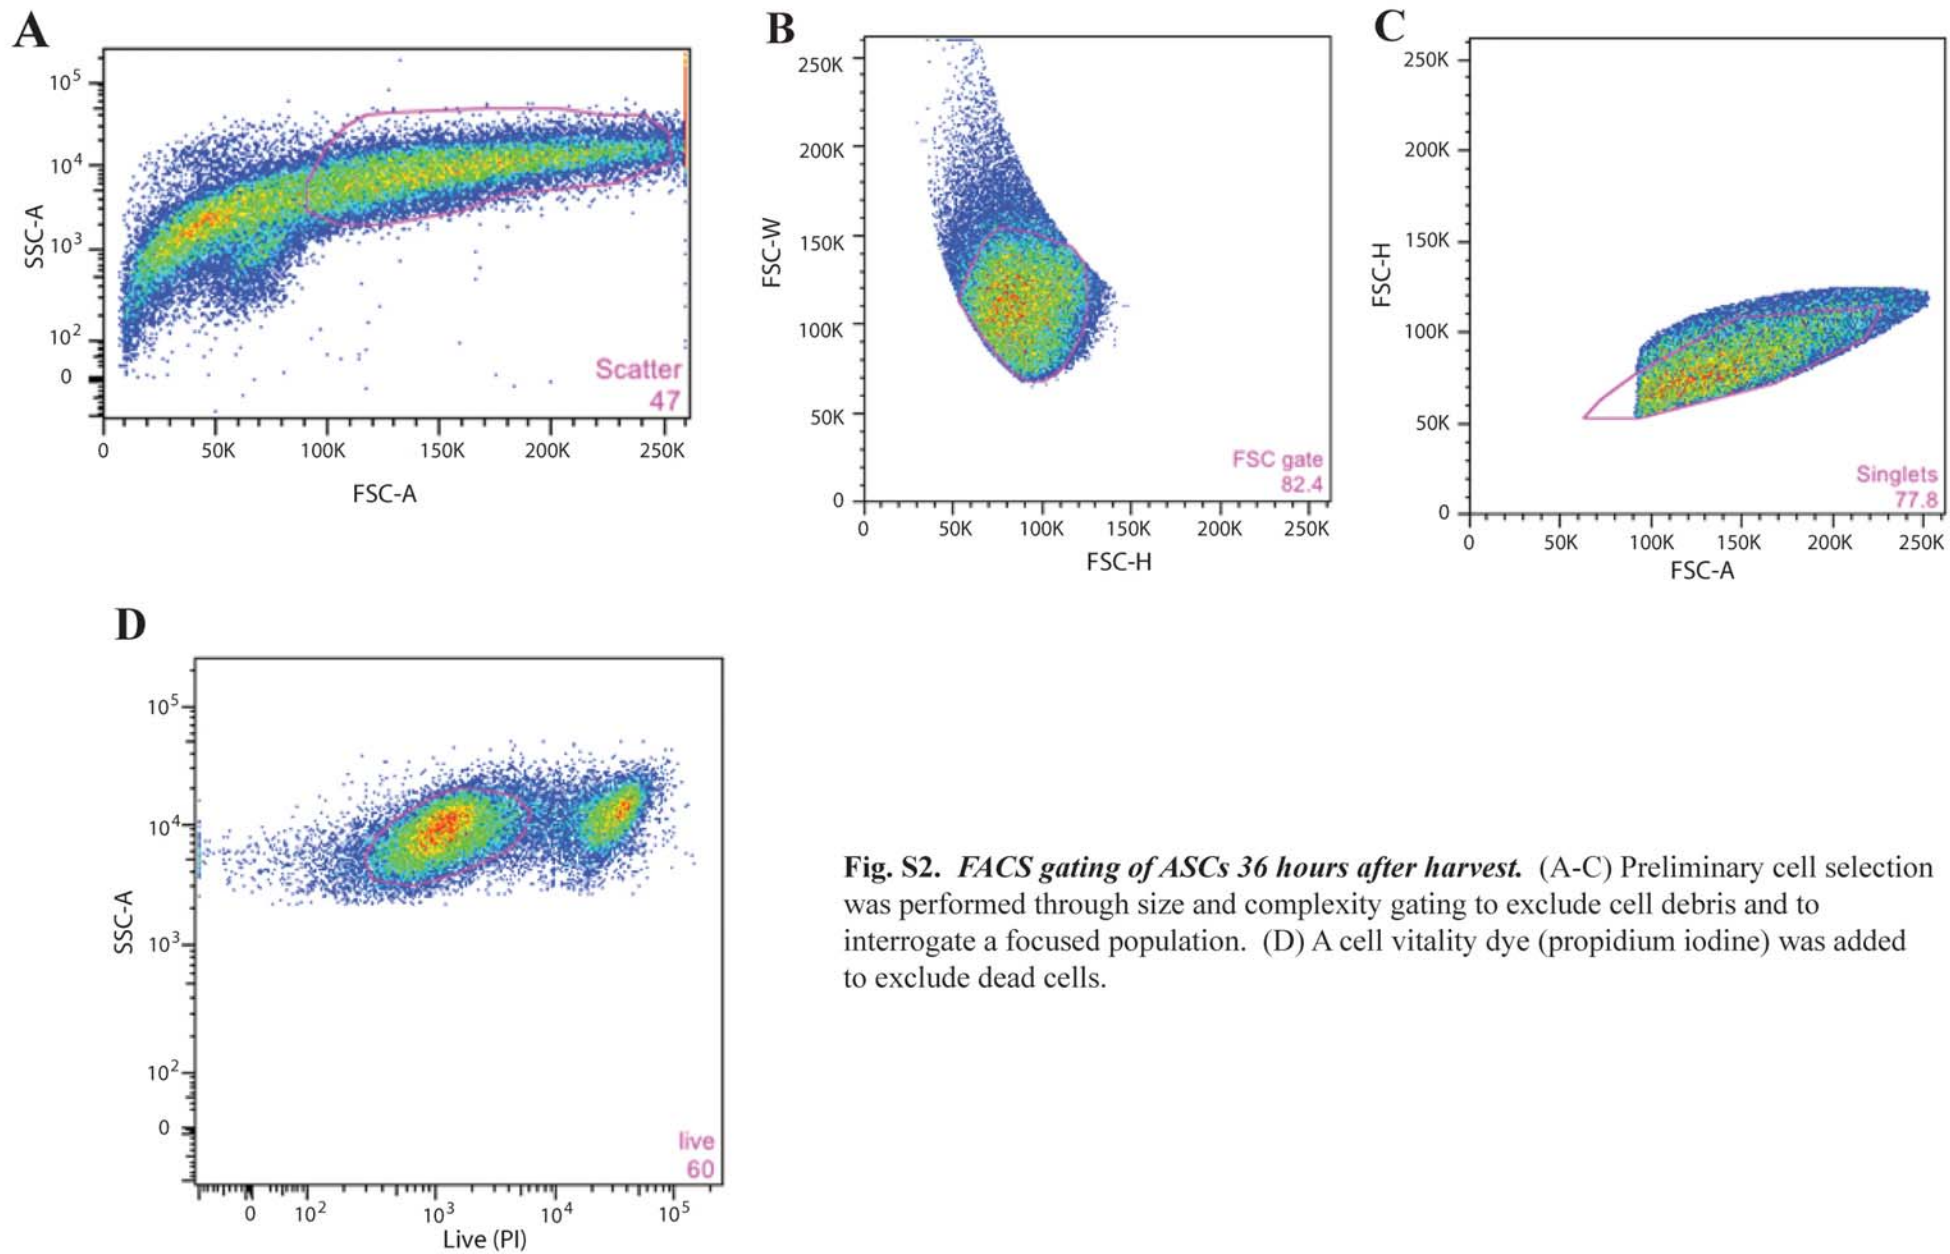

**Fig. S2. FACS gating of ASCs 36 hours after harvest.** (A-C) Preliminary cell selection was performed through size and complexity gating to exclude cell debris and to interrogate a focused population. (D) A cell vitality dye (propidium iodine) was added to exclude dead cells.

## Supplemental Figure 3

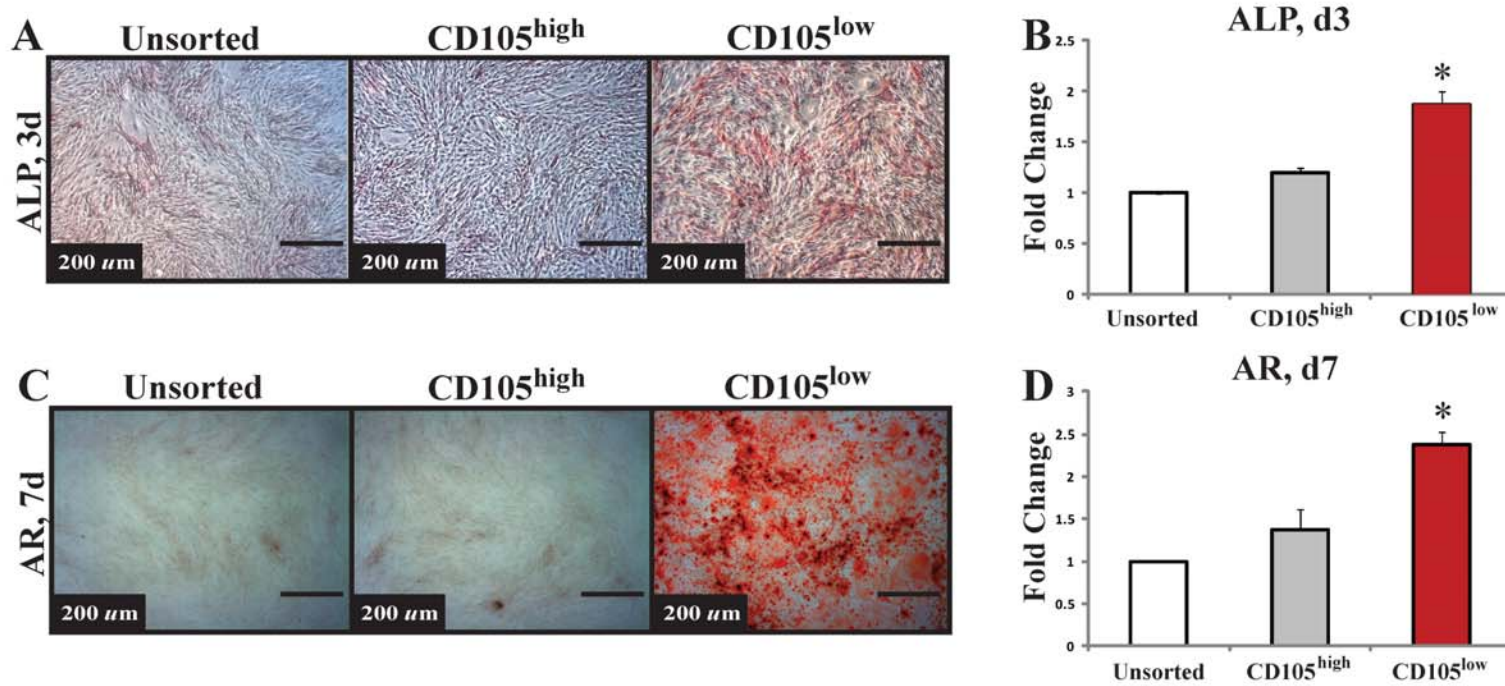

**Fig. S3. Osteogenic Differentiation of Serum Starved sorted ASCs.** (A) Alkaline phosphatase staining following three days of osteogenic differentiation. (B) Quantification of Alkaline phosphatase stain. (C) Alizarin red staining following seven days of osteogenic differentiation. (D) Quantification of Alizarin Red stain. Note despite cell-cycle synchronization prior to sort, CD105<sup>low</sup> ASCs continue to demonstrate enhanced osteogenesis relative to other groups.

## Supplemental Figure 4

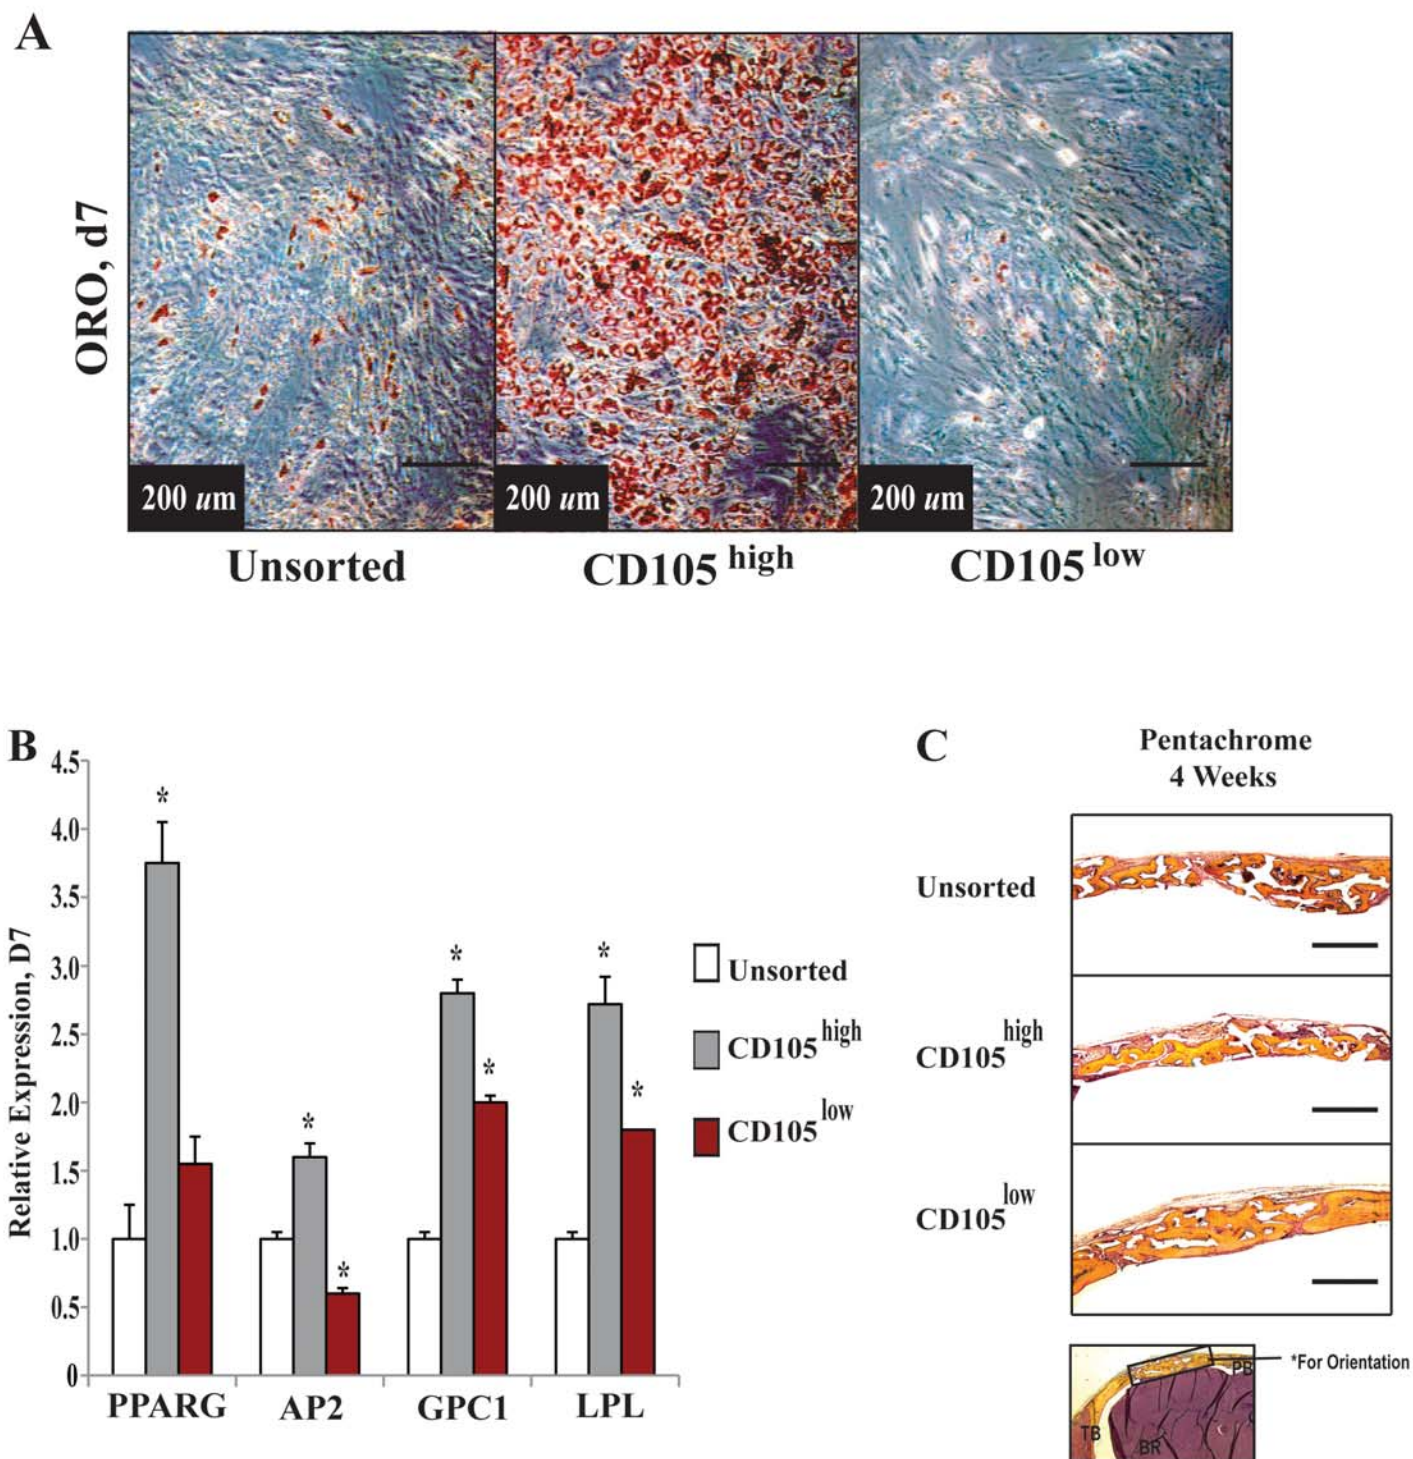

**Fig. S4. Adipogenic and Chondrogenic Differentiation of sorted ASCs.** (A) Oil red O staining showed enhanced adipogenic differentiation for CD105<sup>high</sup> ASCs compared to unsorted and CD105<sup>low</sup> cells. (B) Gene expression analysis confirmed histological staining, with the most significant upregulation of adipogenic genes among the CD105<sup>high</sup> ASCs. (C) Pentachrome stain of critical-sized calvarial defects four weeks after treatment with the following: 1) unsorted ASCs, 2) CD105<sup>high</sup> ASCs and 3) CD105<sup>low</sup> ASCs. Of note, there is absence of blue staining which would represent cartilage. Thus, the bone formed is likely due to intramembranous ossification.

# Supplemental Figure 5

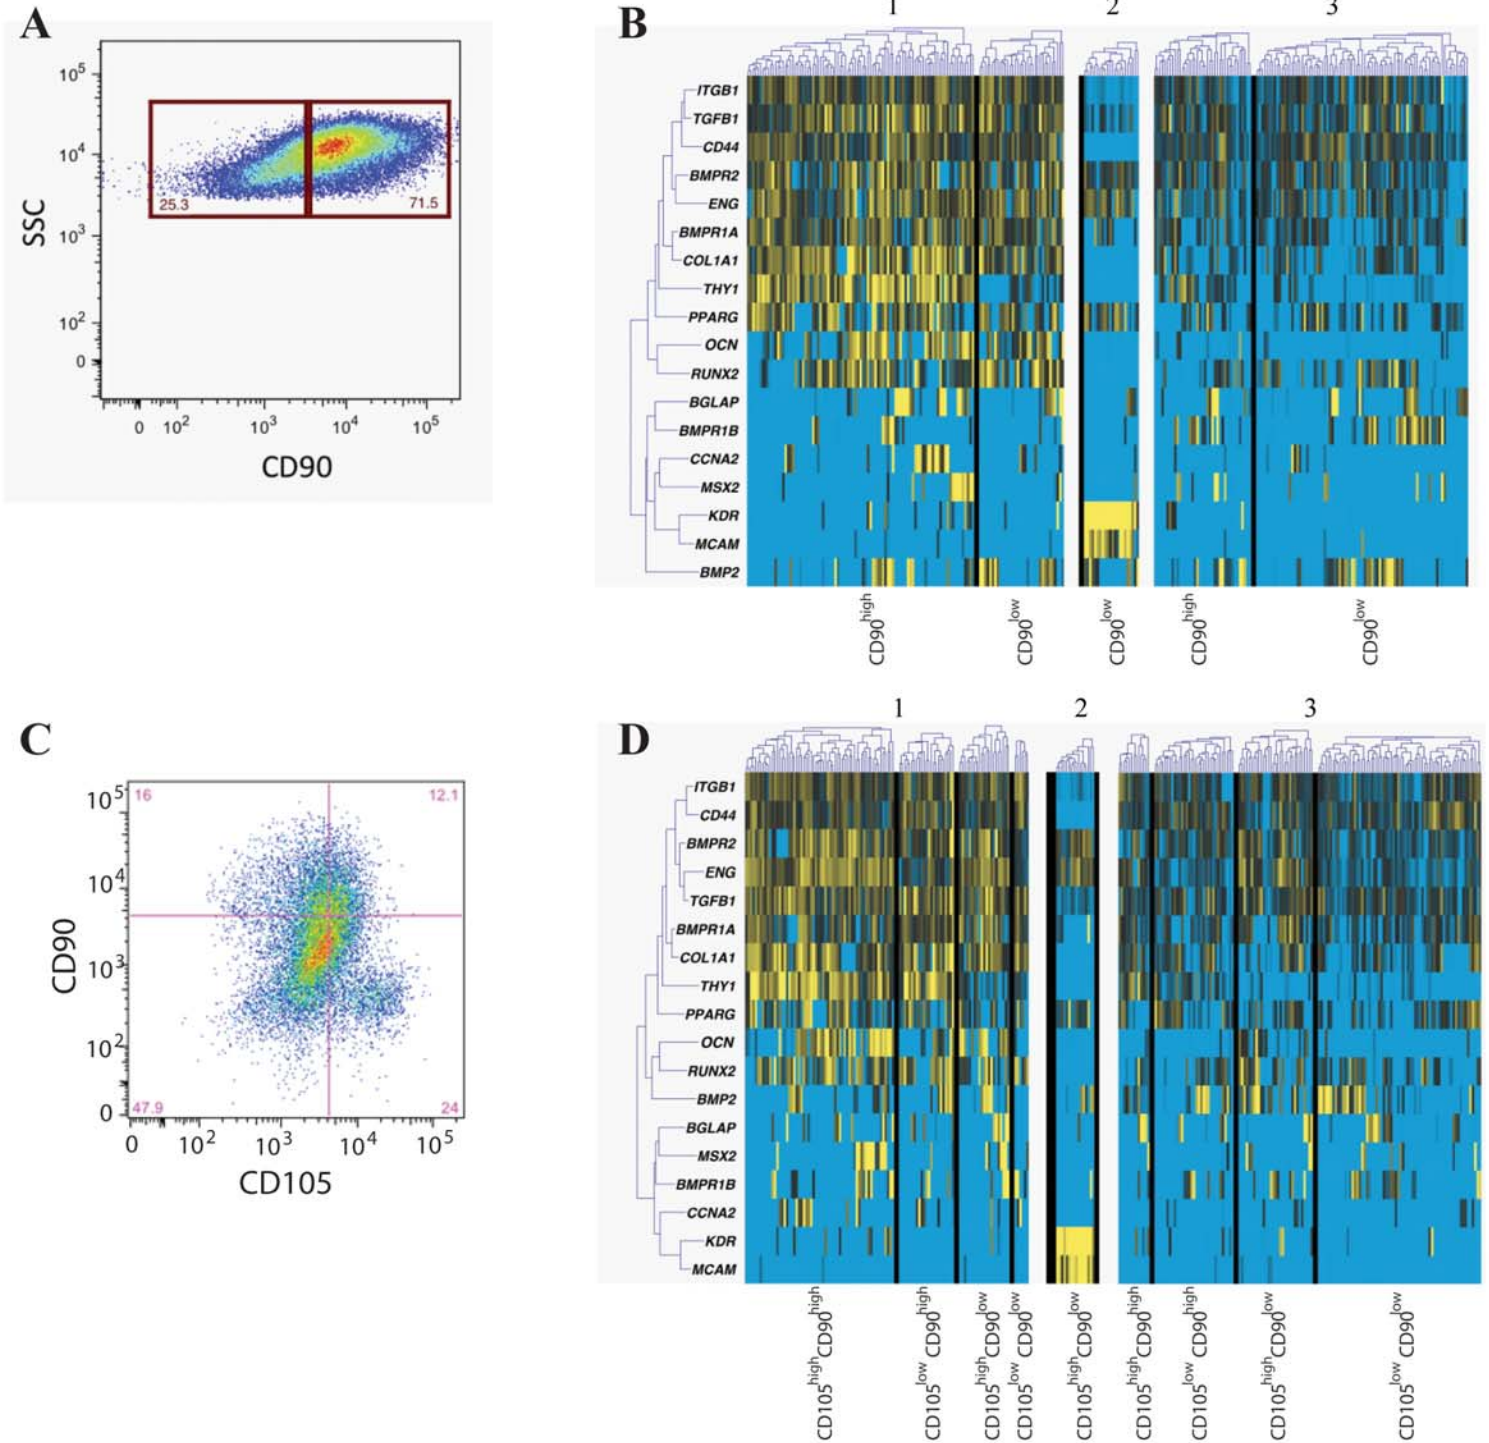

**Fig. S5. FACS analysis and microfluidic-based single cell transcriptional characterization of CD90 single-sorted and CD105 CD90 double-sorted ASCs.** (A) FACS analysis of CD90 expression 36 hours after ASC harvest. (B) Clustering of osteogenic gene expression data using an information theory-based algorithm (blinded to sorting parameters). Each cluster is further partitioned with respect to CD90 surface expression. (C) FACS analysis of joint CD105 and CD90 expression 36 hours after ASC harvest. (D) Partitioning of osteogenic gene clusters based on CD105 and CD90 expression demonstrating asymmetry in gene expression between each of the four groups ( $CD105^{high} CD90^{high}$ ,  $CD105^{low} CD90^{high}$ ,  $CD105^{high} CD90^{low}$  and  $CD105^{low} CD90^{low}$ ).

# Supplemental Figure 6

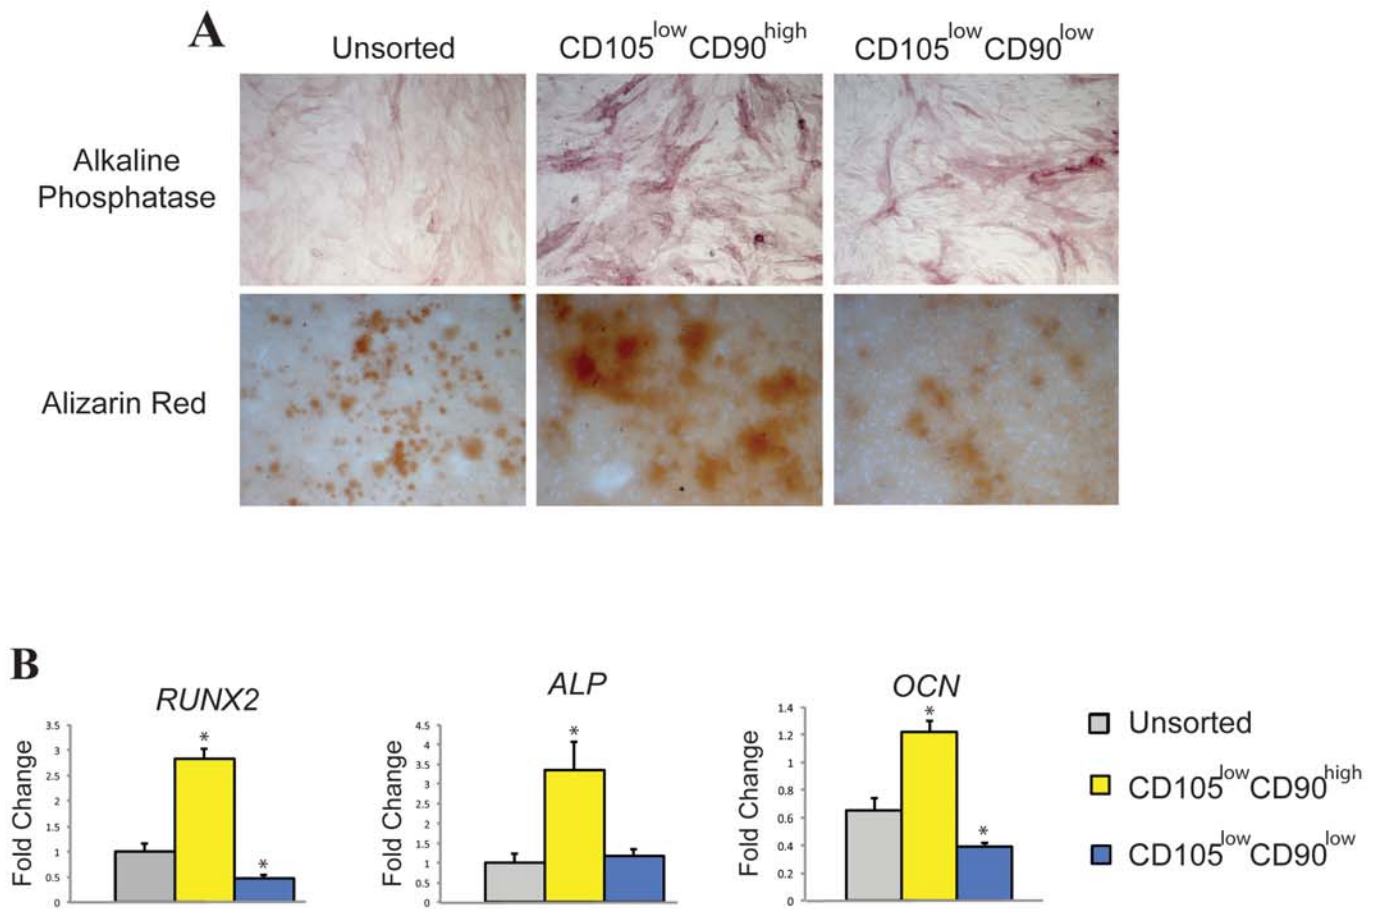

**Fig. S6. Osteogenic Differentiation of CD105<sup>low</sup> CD90 double-sorted ASCs.** (A) Alkaline Phosphatase and Alizarin Red stains of CD105<sup>low</sup> ASCs that were either CD90<sup>high</sup> or CD90<sup>low</sup>. (B) Osteogenic gene expression of unsorted, CD105<sup>low</sup> CD90<sup>high</sup> and CD105<sup>low</sup> CD90<sup>low</sup> hASCs after three days in osteogenic medium (*RUNX2*, *ALP* and *OCN*).



## Supplemental Figure 7

A

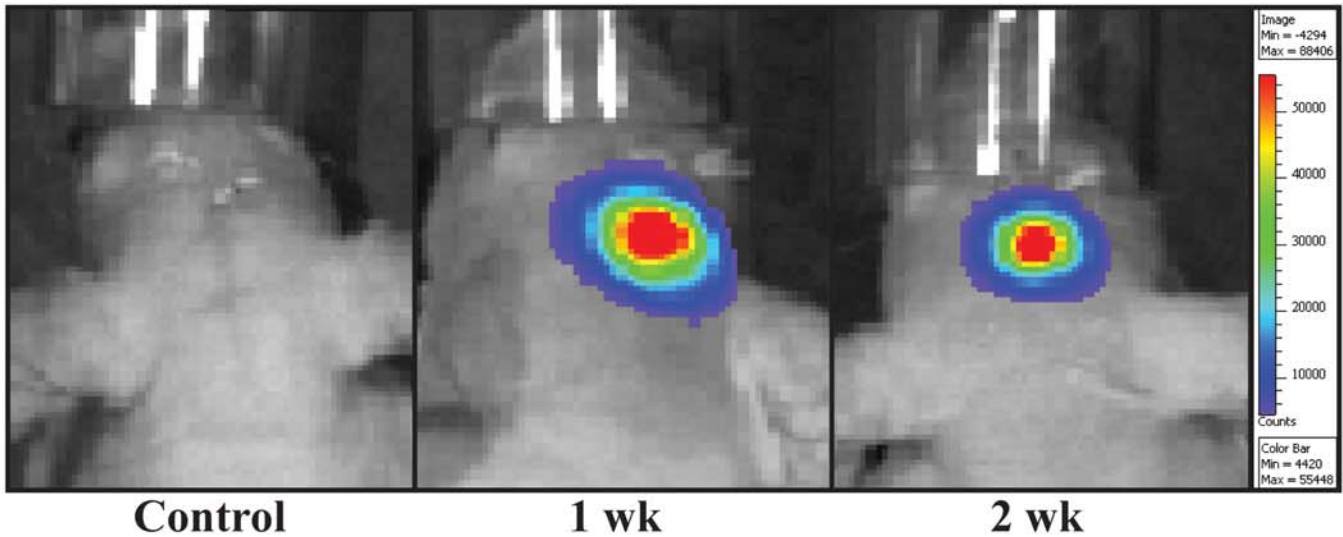

B

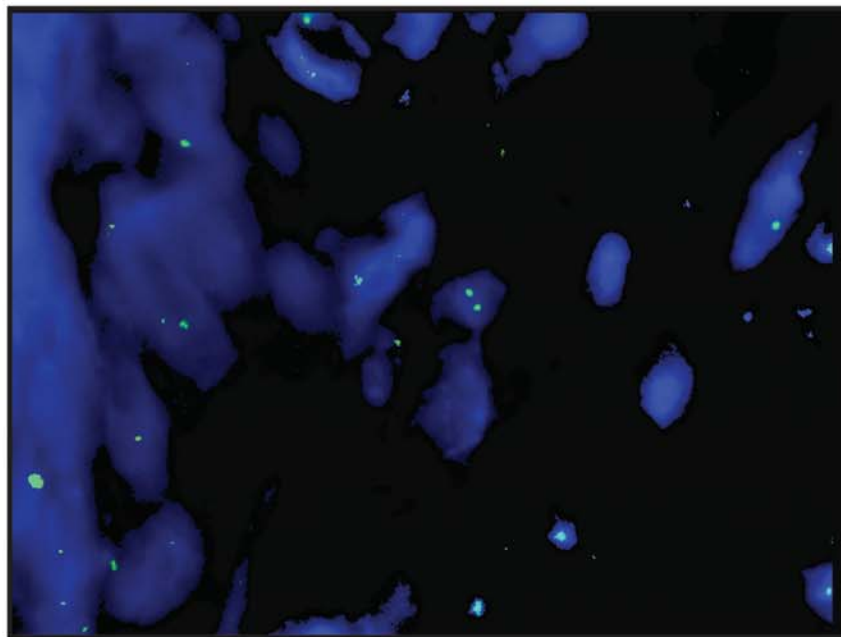

**FISH, Human X Chromosome**

**Fig. S7. Demonstration of cell persistence in vivo.** (A) Luciferase activity in defects engrafted with Luc+ hASCs. Red represents the highest level of activity, followed by yellow, blue, dark blue, and purple. (B) Fluorescent *in situ* hybridization for human X chromosome, appearing green. DAPI nuclear counterstain appearing blue. As expected, many of the cells within the defect site at one week were of human origin, showing human X chromosomes. Specificity of FISH analysis was assessed, as sites other than the defect were negative (data not shown).

# Supplemental Figure 8

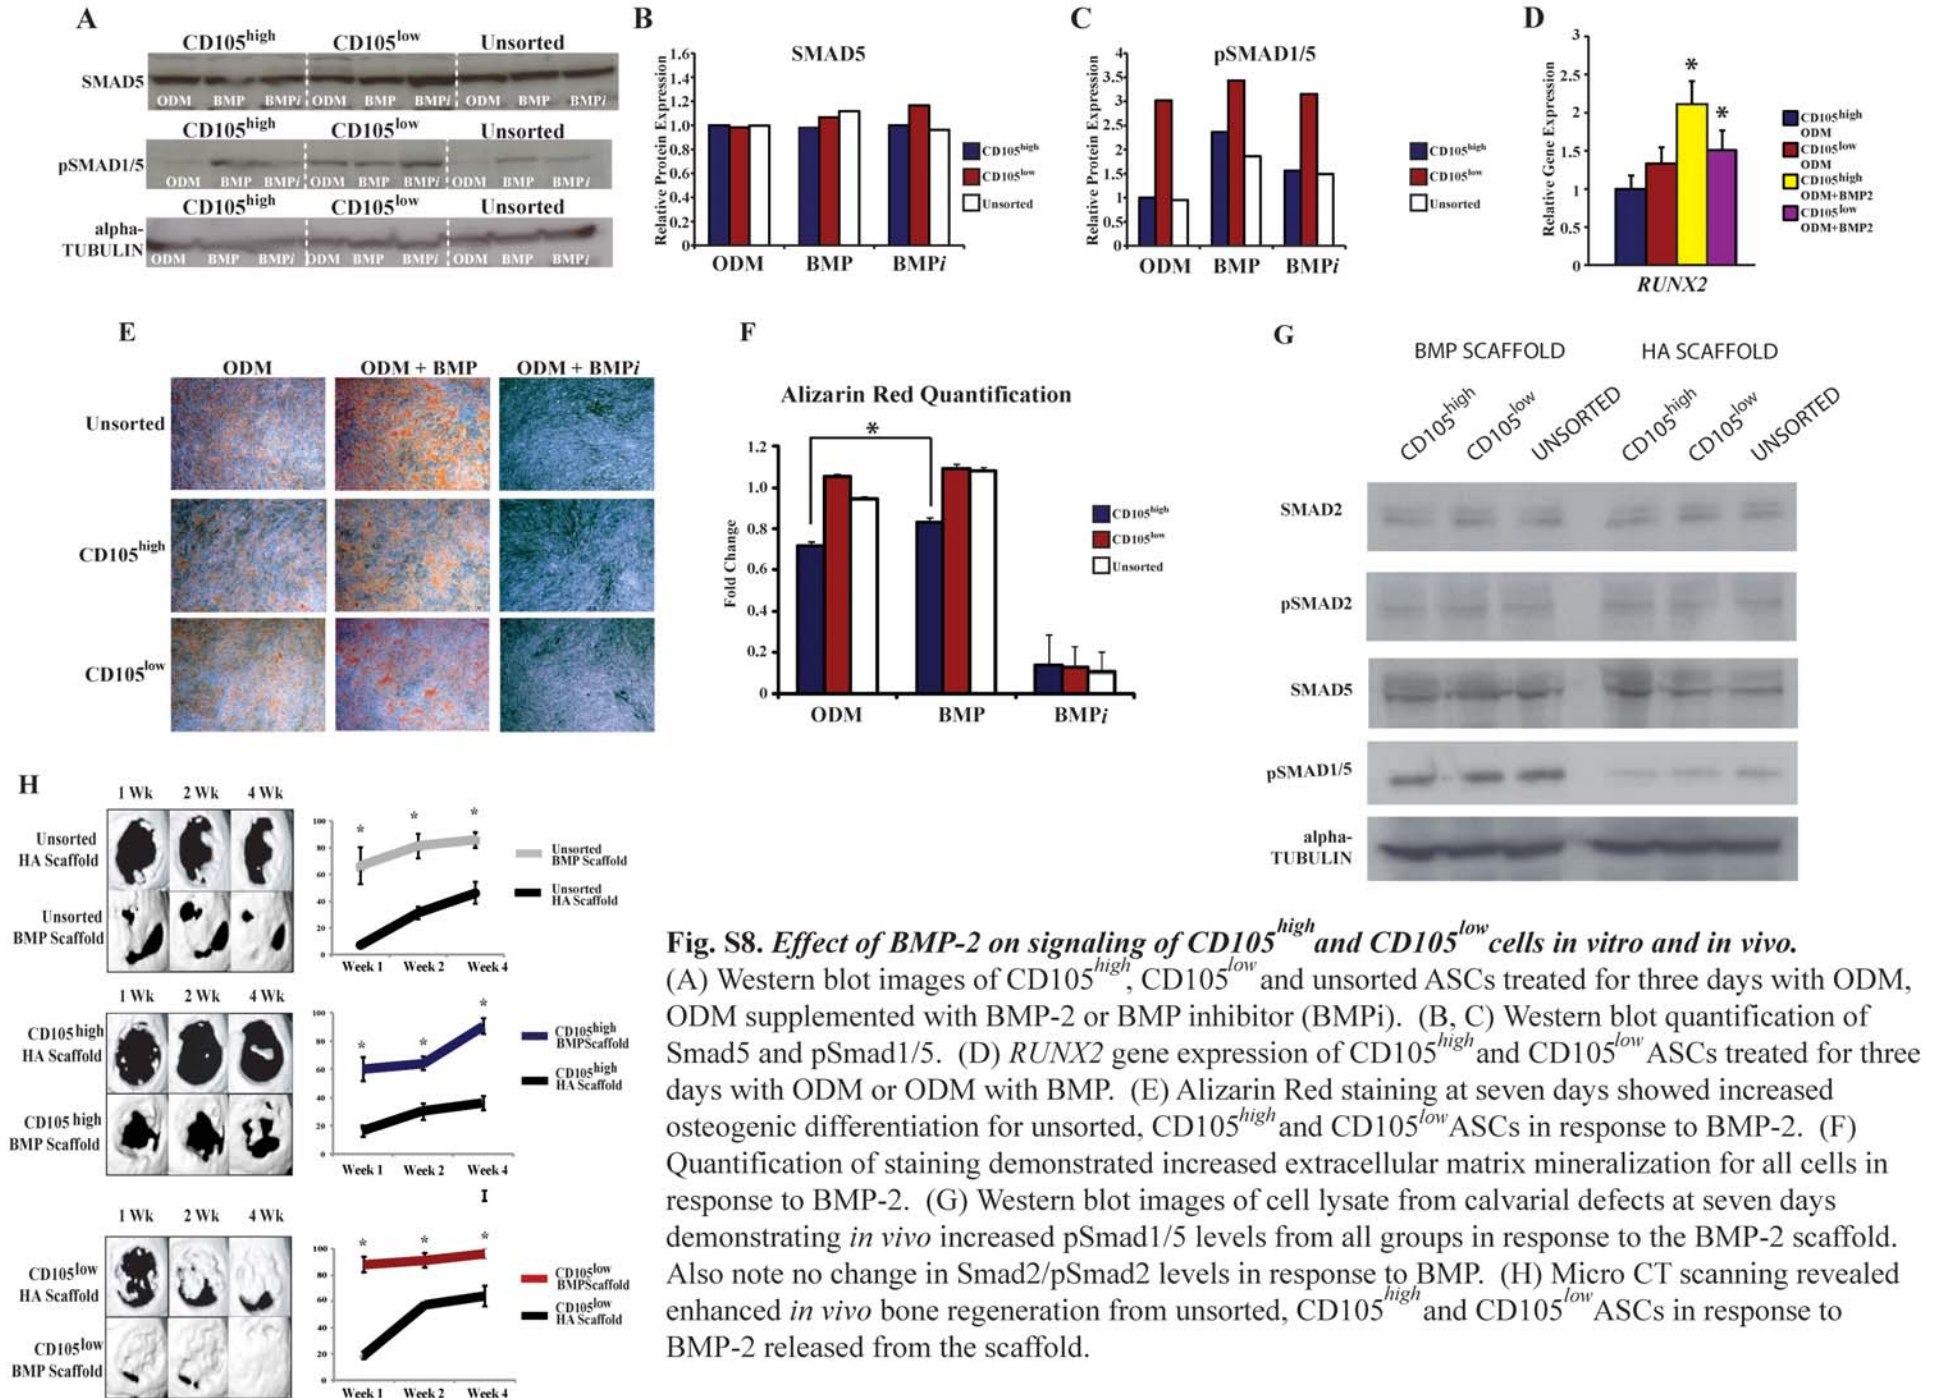

**Fig. S8. Effect of BMP-2 on signaling of CD105<sup>high</sup> and CD105<sup>low</sup> cells in vitro and in vivo.** (A) Western blot images of CD105<sup>high</sup>, CD105<sup>low</sup> and unsorted ASCs treated for three days with ODM, ODM supplemented with BMP-2 or BMP inhibitor (BMPi). (B, C) Western blot quantification of Smad5 and pSmad1/5. (D) *RUNX2* gene expression of CD105<sup>high</sup> and CD105<sup>low</sup> ASCs treated for three days with ODM or ODM with BMP. (E) Alizarin Red staining at seven days showed increased osteogenic differentiation for unsorted, CD105<sup>high</sup> and CD105<sup>low</sup> ASCs in response to BMP-2. (F) Quantification of staining demonstrated increased extracellular matrix mineralization for all cells in response to BMP-2. (G) Western blot images of cell lysate from calvarial defects at seven days demonstrating *in vivo* increased pSmad1/5 levels from all groups in response to the BMP-2 scaffold. Also note no change in Smad2/pSmad2 levels in response to BMP. (H) Micro CT scanning revealed enhanced *in vivo* bone regeneration from unsorted, CD105<sup>high</sup> and CD105<sup>low</sup> ASCs in response to BMP-2 released from the scaffold.
